# Supplementary material for: Blood Metabolomic Profiling Confirms and Identifies Biomarkers of Food Intake
Source: MDPI journal article supplement (doi:10.3390/metabo10110468), 2020-11-17
Supplement: s1 [file s1]

## Supplementary data

**Table S1:** Self-reported usual dietary intake in g/d of the study sample

| Food group                 | Total            | Men             | Women           |
|----------------------------|------------------|-----------------|-----------------|
|                            | n = 849          | n = 485         | n = 364         |
| Beer Cider                 | 38.31 [138.4]    | 71.25 [201.45]  | 8.2 [16.4]      |
| Bread                      | 89.89 [44.89]    | 100.97 [44.25]  | 75.78 [34.47]   |
| Butter                     | 7.87 [12.71]     | 9.05 [16.67]    | 6.96 [9.9]      |
| Cabbages                   | 22.9 [13.22]     | 25.07 [13.71]   | 20.69 [11.82]   |
| Cake cookies               | 51.6 [50.58]     | 52.66 [50.74]   | 48.2 [47.93]    |
| Cheese                     | 33.12 [21.19]    | 33.28 [20.99]   | 32.77 [20.33]   |
| Chocolate                  | 8.97 [10.86]     | 11 [11.95]      | 8.97 [9.23]     |
| Coffee                     | 370.78 [478.18]  | 390.28 [490.3]  | 356.83 [121.36] |
| Dairy products             | 94.04 [86.57]    | 89.14 [84.69]   | 100.74 [89.08]  |
| Eggs                       | 18.34 [11.97]    | 18.14 [11.4]    | 19.92 [12.28]   |
| Fish                       | 21.45 [29.52]    | 31.43 [27.88]   | 21.45 [23.41]   |
| Fruit and vegetable juice  | 59.35 [141.45]   | 70.29 [180.45]  | 43.16 [100.85]  |
| Fruiting vegetables        | 80.41 [42.17]    | 80.66 [45.75]   | 80.27 [39.93]   |
| Fruits                     | 180.4 [163.23]   | 165.06 [124.23] | 200.54 [196.89] |
| Leafy vegetables           | 12.49 [13.49]    | 13.08 [15.25]   | 12.1 [11.53]    |
| Legumes                    | 1.82 [2.49]      | 1.82 [4.98]     | 1.2 [0]         |
| Liquor <sup>1</sup>        | 0 [1.3]          | 0 [1.3]         | 0 [1.3]         |
| Margarines                 | 10.95 [15.97]    | 14.19 [17.45]   | 7.3 [10.49]     |
| Milk                       | 53.55 [172.16]   | 55.07 [193.93]  | 52.49 [121.08]  |
| Miscellaneous              | 4.57 [2.5]       | 4.61 [2.4]      | 4.48 [2.68]     |
| Mushrooms <sup>2</sup>     | 3.74 [0.91]      | 3.81 [0.89]     | 3.6 [0.83]      |
| Nuts and seeds             | 2.15 [3.99]      | 2.87 [2.49]     | 2.15 [4.16]     |
| Offals                     | 0.92 [2.25]      | 1.17 [2.25]     | 0.13 [2.18]     |
| Other alcoholic beverages  | 3.35 [9.77]      | 4.01 [12.62]    | 3.28 [6.58]     |
| Other cereals              | 7.3 [8.1]        | 8.07 [10.58]    | 6.19 [6.12]     |
| Other fats                 | 1.78 [1.11]      | 2.01 [1.23]     | 1.53 [0.78]     |
| Other fruits               | 2.79 [2.82]      | 2.52 [2.13]     | 3.58 [4.02]     |
| Other non-alcoholic drinks | 814.27 [1014.32] | 807.04 [959.47] | 1095.6 [796.46] |
| Other vegetables           | 36.2 [16.75]     | 36.63 [16.29]   | 35.88 [16.84]   |
| Pasta rice                 | 36.5 [30.83]     | 36.48 [22.49]   | 47.13 [28.94]   |
| Potatoes                   | 84.2 [69.18]     | 94.44 [70.11]   | 68.75 [64.21]   |
| Poultry                    | 11.62 [14.08]    | 11.72 [13.66]   | 11.25 [15.34]   |
| Processed meat             | 43.16 [37.66]    | 55.77 [35.33]   | 27.87 [23.01]   |
| Red meat                   | 38.36 [49.43]    | 56.77 [61.04]   | 25.11 [28.49]   |
| Root vegetables            | 18.3 [14.5]      | 18.17 [14.21]   | 18.94 [15.52]   |
| Sauces                     | 47.68 [29.85]    | 49.55 [29.6]    | 46.24 [29.93]   |

## Supplementary data

| Food group    | Total           | Men            | Women           |
|---------------|-----------------|----------------|-----------------|
| Soft drinks   | 13.63 [43.89]   | 14.29 [152.14] | 13.63 [8.1]     |
| Soups         | 32.96 [26.57]   | 34.48 [22.43]  | 30.44 [30.6]    |
| Spirits       | 0.26 [0.77]     | 0.26 [2.22]    | 0 [0.26]        |
| Sugar         | 35.06 [32.27]   | 36.6 [37.22]   | 32.21 [32.12]   |
| Tea           | 108.73 [275.03] | 58.33 [263.35] | 254.27 [362.71] |
| Vegetable oil | 7.74 [5.41]     | 7.91 [5.7]     | 7.51 [5.02]     |
| Wine          | 32.48 [87.84]   | 37.83 [92.64]  | 30.46 [84.95]   |

Food items of the food groups <sup>1</sup>other alcoholic beverages and <sup>2</sup>other vegetables; Median and the interquartile range in square bracket

## Supplementary data

**Table S2:** Characteristics of the included studies

| Study Number | Author, year, country*, [reference]            | Parent study                     | Number of participants (sex)                                                 | Dietary assessment method | Bio sample                                                             | Number of measured metabolites                                    |
|--------------|------------------------------------------------|----------------------------------|------------------------------------------------------------------------------|---------------------------|------------------------------------------------------------------------|-------------------------------------------------------------------|
| 1            | Playdon et al., 2017, FI [15]                  | PLCO Cancer Screening Trial      | 1.242 (only women)                                                           | FFQ                       | Serum non-fasting samples                                              | 617 (only known metabolites)                                      |
| 2            | Pallister et al., 2016, UK [6]                 | TwinsUK registry                 | 3.559 (only women)                                                           | FFQ                       | Fasting serum and plasma samples                                       | 601 (442 known and 159 unknown)                                   |
| 3            | Zheng et al., 2014, US [9]                     | ARIC Study                       | 1.977 (702 men, 1275 women)                                                  | FFQ                       | Fasting serum samples                                                  | 356 (only known metabolites included)                             |
| 4            | Playdon et al., 2016, US [8]                   | Colon adenoma case-control study | 253 (77% men with non-fasting serum and 100% with non-fasting urine samples) | FFQ                       | Non-fasting serum samples and 12-h overnight non-fasting urine samples | 676 serum metabolites and 848 urine metabolites                   |
| 5            | Wang et al., 2018, NO [16]                     | CPS-II Nutrition Cohort          | 1.369 (only women)                                                           | FFQ                       | Non-fasting serum samples                                              | 1186 (no information on known/unknown metabolites)                |
| 6            | Guertin et al., 2014, US [7]                   | PLCO Cancer Screening Trial      | 502 (281 men and 221 women)                                                  | FFQ                       | Serum samples (no information about fasting/non-fasting available)     | 643 (412 known and 231 unknown metabolites)                       |
| 7            | Playdon et al., 2017, FI [17]                  | ATBC Study                       | 1336 (only men)                                                              | FFQ                       | Fasting serum samples                                                  | 1316 (1 overall 994–1220 metabolites of which 626–722 were known) |
| 8            | Guertin et al., 2015, US [18]                  | PLCO Cancer Screening Trial      | 498 (279 men, 219 women)                                                     | FFQ                       | Non-fasting serum samples                                              | 657 (428 known and 229 unknown metabolites)                       |
| 9            | Rothwell et al., 2019, FR, DE, GR, and IT [19] | EPIC Study                       | 451 (192 men, 259 women)                                                     | 24 h dietary recall       | Serum sample (no information about fasting/non-fasting available)      | No information available                                          |

\* DISO Country Codes (two-letter abbreviation); <sup>1</sup>Data from different nested case-control studies were used; Abbreviations: ARIC, Atherosclerosis Risk in Communities Study; ATBC, Alpha Tocopherol, Beta-Carotene Cancer Prevention Study cohort; EPIC, European Prospective Investigation on Cancer and Nutrition FFQ, Food Frequency Questionnaire; PLCO, Prostate, Lung, Colorectal and Ovarian Cancer Screening Trial

## Supplementary data

**Table S3:** Replicated food-metabolite associations and their corresponding back transformed estimator and confidence interval

| Food group | Metabolite                                                  | Subpathway                                | $\beta$ -Estimator | Confidence interval (CI) | p.value |
|------------|-------------------------------------------------------------|-------------------------------------------|--------------------|--------------------------|---------|
| Alcohol    | ergothioneine                                               | Food Component/Plant                      | 1.0050             | (1.0009, 1.0090)         | 0.0170  |
|            | $\alpha$ -hydroxyisovalerate                                | Leucine, Isoleucine and Valine Metabolism | 1.0058             | (1.0023, 1.0092)         | 0.0062  |
|            | 5 $\alpha$ -androstan-3 $\beta$ ,17 $\beta$ -diol disulfate | Steroid                                   | 1.0048             | (1.0015, 1.0081)         | 0.0183  |
|            | 4-androsten-3 $\beta$ ,17 $\beta$ -diol disulfate 1(1)*     | Steroid                                   | 1.0092             | (1.0066, 1.0118)         | <.0001  |
| Butter     | 10-undecenoate                                              | Medium Chain Fatty Acid                   | 1.0031             | (1.0006, 1.0055)         | 0.0286  |
| Chocolate  | theobromine                                                 | Xanthine Metabolism                       | 1.0199             | (1.0110, 1.0289)         | <.0001  |
|            | 7-methylxanthine                                            | Xanthine Metabolism                       | 1.0212             | (1.0117, 1.0309)         | <.0001  |
| Coffee     | hippurate                                                   | Benzoate Metabolism                       | 1.0003             | (1.0002, 1.0005)         | 1e-04   |
|            | catechol sulfate                                            | Benzoate Metabolism                       | 1.0003             | (1.0002, 1.0004)         | <.0001  |
|            | 3-methyl catechol sulfate(1)                                | Benzoate Metabolism                       | 1.0004             | (1.0002, 1.0006)         | 0.0009  |
|            | X-12816                                                     | unknown                                   | 1.0007             | (1.0005, 1.0010)         | <.0001  |
|            | X-14473                                                     | unknown                                   | 1.0006             | (1.0004, 1.0007)         | <.0001  |
|            | paraxanthine                                                | Xanthine Metabolism                       | 1.0007             | (1.0006, 1.0009)         | <.0001  |
|            | theophylline                                                | Xanthine Metabolism                       | 1.0007             | (1.0005, 1.0009)         | <.0001  |
|            | 1-methylxanthine                                            | Xanthine Metabolism                       | 1.0005             | (1.0002, 1.0007)         | 0.0096  |
|            | 1-methylurate                                               | Xanthine Metabolism                       | 1.0006             | (1.0004, 1.0008)         | <.0001  |
|            | 1,7-dimethylurate                                           | Xanthine Metabolism                       | 1.0006             | (1.0004, 1.0009)         | <.0001  |
|            | 5-acetylamino-6-amino-3-methyluracil (AAMU)                 | Xanthine Metabolism                       | 1.0005             | (1.0003, 1.0007)         | 0.0019  |
|            | caffeine                                                    | Xanthine Metabolism                       | 1.0005             | (1.0003, 1.0007)         | <.0001  |
|            | 3-carboxy-4-methyl-5-propyl-2-furanpropionate (CMPF)        | Fatty Acid, Dicarboxylate                 | 1.0130             | (1.0097, 1.0163)         | <.0001  |
|            | 1-docosahexaenoyl GPC(22:6)*                                | Lysolipid                                 | 1.0091             | (1.0055, 1.0126)         | <.0001  |
| Fish       | eicosapentaenoic acid (EPA)                                 | Polyunsaturated Fatty Acid (n3 and n6)    | 1.0063             | (1.0047, 1.0079)         | <.0001  |
|            | docosahexaenoic acid (DHA)                                  | Polyunsaturated Fatty Acid (n3 and n6)    | 1.0065             | (1.0050, 1.0080)         | <.0001  |
|            | X-02269                                                     | unknown                                   | 1.0111             | (1.0082, 1.0139)         | <.0001  |
| Poultry    | 3-methylhistidine                                           | Histidine Metabolism                      | 1.0108             | (1.0024, 1.0193)         | 0.0251  |
| Wine       | X-11795                                                     | unknown                                   | 1.0004             | (1.0002, 1.0006)         | 0.0015  |

**Table S4:** Food-metabolite associations in the identification analysis for women and their corresponding back transformed estimator and confidence interval found in the train dataset

| Food group | Metabolite                     | Subpathway             | $\beta$ -Estimator | Confidence interval (CI) | p.value |
|------------|--------------------------------|------------------------|--------------------|--------------------------|---------|
| Beer Cider | cyclo(leu pro)                 | Dipeptide              | 1.0004             | (1.0001,1.0007)          | 0.0142  |
|            | cysteine-glutathione disulfide | Glutathione Metabolism | 0.9996             | (0.9992,0.9999)          | 0.0271  |
|            | palmitoleate (16:1n7)          | Long Chain Fatty Acid  | 1.0002             | (1,1.0005)               | 0.0363  |
|            | eicosenoate (20:1)             | Long Chain Fatty Acid  | 1.0002             | (1,1.0004)               | 0.0295  |

## Supplementary data

| Food group   | Metabolite                                                  | Subpathway                                           | $\beta$ -Estimator | Confidence interval (CI) | p.value |
|--------------|-------------------------------------------------------------|------------------------------------------------------|--------------------|--------------------------|---------|
| Butter       | 1-margaroyl-GPC ( 17:0)                                     | Lysolipid                                            | 0.9995             | (0.9991,0.9999)          | 0.03    |
|              | dihomo-linoleate (20:2n6)                                   | Polyunsaturated Fatty Acid (n3 and n6)               | 1.0002             | (1.0001,1.0004)          | 0.013   |
|              | eicosapentaenoate (EPA 20:5n3)                              | Polyunsaturated Fatty Acid (n3 and n6)               | 1.0002             | (1,1.0004)               | 0.0408  |
|              | docosahexaenoate (DHA 22:6n3)                               | Polyunsaturated Fatty Acid (n3 and n6)               | 1.0001             | (1,1.0003)               | 0.0428  |
|              | docosapentaenoate (n3DPA 22:5n3)                            | Polyunsaturated Fatty Acid (n3 and n6)               | 1.0002             | (1,1.0004)               | 0.0241  |
|              | Adrenate (22:4n6)                                           | Polyunsaturated Fatty Acid (n3 and n6)               | 1.0002             | (1,1.0004)               | 0.0269  |
|              | urate                                                       | Purine Metabolism, (Hypo)Xanthine/Inosine containing | 1.0000             | (1,1.0001)               | 0.0441  |
|              | 5 $\alpha$ -androstan-3 $\beta$ ,17 $\beta$ -diol disulfate | Steroid                                              | 1.0003             | (1,1.0005)               | 0.0425  |
|              | 4-androsten-3 $\beta$ ,17 $\beta$ -diol disulfate(1)*       | Steroid                                              | 1.0005             | (1.0001,1.0008)          | 0.0207  |
|              | X-11315                                                     | unknown                                              | 0.9998             | (0.9997,1)               | 0.0274  |
|              | X-11444                                                     | unknown                                              | 0.9997             | (0.9994,1)               | 0.0491  |
|              | X-11799                                                     | unknown                                              | 1.0003             | (1.0001,1.0006)          | 0.0157  |
|              | X-14473                                                     | unknown                                              | 1.0004             | (1.0001,1.0008)          | 0.0106  |
|              | X-21365                                                     | unknown                                              | 0.9999             | (0.9998,1)               | 0.0374  |
|              | theobromine                                                 | Xanthine Metabolism                                  | 0.9995             | (0.9992,0.9999)          | 0.0058  |
|              | 17-methylstearate                                           | Fatty Acid, Branched                                 | 1.0107             | (1.0027,1.0187)          | 0.0098  |
|              | 15-methylpalmitate                                          | Fatty Acid, Branched                                 | 1.0135             | (1.0053,1.0217)          | 0.0017  |
|              | margarate (17:0)                                            | Long Chain Fatty Acid                                | 1.0031             | (1.0001,1.0062)          | 0.0496  |
|              | 10-nonadecenoate (19:1n9)                                   | Long Chain Fatty Acid                                | 1.0044             | (1.0006,1.0083)          | 0.0246  |
|              | X-11261                                                     | unknown                                              | 0.9926             | (0.9872,0.9981)          | 0.0123  |
|              | X-11438                                                     | unknown                                              | 1.0107             | (1.0017,1.0198)          | 0.0226  |
| Cake cookies | 4-androsten-3 $\beta$ ,17 $\beta$ -diol disulfate(1)*       | Steroid                                              | 0.9976             | (0.9957,0.9995)          | 0.0155  |
|              | X-11372                                                     | unknown                                              | 1.0016             | (1.0004,1.0028)          | 0.0092  |
| Cheese       | catechol sulfate                                            | Benzoate Metabolism                                  | 1.0040             | (1.0006,1.0074)          | 0.0236  |
|              | 4-methylcatechol sulfate                                    | Benzoate Metabolism                                  | 1.0064             | (1.0003,1.0125)          | 0.0423  |
| Chocolate    | 2-aminobutyrate                                             | Methionine, Cysteine, SAM and Taurine Metabolism     | 0.9965             | (0.9932,0.9998)          | 0.0424  |
| Chocolate    | theobromine                                                 | Xanthine Metabolism                                  | 1.0227             | (1.0067,1.039)           | 0.0098  |
|              | 3-methylxanthine                                            | Xanthine Metabolism                                  | 1.0160             | (1.0007,1.0316)          | 0.0461  |
|              | 7-methylxanthine                                            | Xanthine Metabolism                                  | 1.0206             | (1.0036,1.0379)          | 0.0251  |
| Coffee       | catechol sulfate                                            | Benzoate Metabolism                                  | 1.0002             | (1.0001,1.0004)          | 0.0142  |
|              | 4-vinylphenol sulfate                                       | Benzoate Metabolism                                  | 1.0004             | (1.0001,1.0007)          | 0.0194  |
|              | 3-methylcatechol sulfate(1)                                 | Benzoate Metabolism                                  | 1.0004             | (1.0001,1.0007)          | 0.0167  |
|              | cyclo(leu pro)                                              | Dipeptide                                            | 1.0003             | (1,1.0006)               | 0.0314  |
|              | N-(2-furoyl)glycine                                         | Food Component/Plant                                 | 1.0003             | (1,1.0006)               | 0.0466  |

## Supplementary data

| Food group          | Metabolite                                          | Subpathway                                       | $\beta$ -Estimator | Confidence interval (CI) | p.value |
|---------------------|-----------------------------------------------------|--------------------------------------------------|--------------------|--------------------------|---------|
| Dairy products      | X-12816                                             | unknown                                          | 1.0008             | (1.0005,1.0011)          | <.0001  |
|                     | X-14465                                             | unknown                                          | 1.0004             | (1.0001,1.0007)          | 0.0219  |
|                     | X-14473                                             | unknown                                          | 1.0007             | (1.0004,1.001)           | <.0001  |
|                     | X-16125                                             | unknown                                          | 1.0006             | (1.0003,1.0009)          | 0.0011  |
|                     | dimethylarginine(SDMA+ADMA)                         | Urea cycle; Arginine and Proline Metabolism      | 0.9997             | (0.9994,1)               | 0.0373  |
|                     | paraxanthine                                        | Xanthine Metabolism                              | 1.0008             | (1.0005,1.0011)          | <.0001  |
|                     | theophylline                                        | Xanthine Metabolism                              | 1.0008             | (1.0005,1.001)           | <.0001  |
|                     | 1-methylurate                                       | Xanthine Metabolism                              | 1.0006             | (1.0003,1.0008)          | 3e-04   |
|                     | 1,7-dimethylurate                                   | Xanthine Metabolism                              | 1.0006             | (1.0002,1.001)           | 0.0036  |
|                     | 5-acetylamino-6-formylamino-3-methyluracil          | Xanthine Metabolism                              | 1.0004             | (1,1.0007)               | 0.0385  |
|                     | 5-acetylamino-6-amino-3-methyluracil (AAMU)         | Xanthine Metabolism                              | 1.0005             | (1.0002,1.0008)          | 0.0049  |
|                     | caffeine                                            | Xanthine Metabolism                              | 1.0006             | (1.0003,1.0009)          | 2e-04   |
|                     | X-21365                                             | unknown                                          | 1.0007             | (1.0002,1.0012)          | 0.0054  |
|                     | indoleacetate                                       | Tryptophan Metabolism                            | 1.0045             | (1.0001,1.0089)          | 0.0455  |
|                     | X-18554                                             | unknown                                          | 1.0090             | (1.0009,1.0171)          | 0.0294  |
| Fish                | creatine                                            | Creatine Metabolism                              | 1.0026             | (1.0003,1.0049)          | 0.0337  |
|                     | 3-carboxy-4-methyl-5-propyl-2-furanpropanoate(CMPF) | Fatty Acid, Dicarboxylate                        | 1.0147             | (1.0094,1.0199)          | <.0001  |
|                     | pyroglutamine*                                      | Glutamate Metabolism                             | 0.9966             | (0.9941,0.9992)          | 0.0133  |
|                     | erucate (22:1n9)                                    | Long Chain Fatty Acid                            | 1.0059             | (1.0007,1.0111)          | 0.0295  |
|                     | eicosenoate (20:1)                                  | Long Chain Fatty Acid                            | 1.0034             | (1.0007,1.0062)          | 0.0184  |
|                     | 1-docosahexaenoyl-GPC(22:6)*                        | Lysolipid                                        | 1.0089             | (1.0042,1.0135)          | 2e-04   |
|                     | 1-eicosapentaenoyl-GPC(20:5)*                       | Lysolipid                                        | 1.0052             | (1.0018,1.0086)          | 0.0041  |
|                     | 1-docosahexaenoyl-GPE(22:6)*                        | Lysolipid                                        | 1.0033             | (1.001,1.0056)           | 0.0078  |
|                     | 2-aminobutyrate                                     | Methionine, Cysteine, SAM and Taurine Metabolism | 1.0019             | (1.0003,1.0035)          | 0.0302  |
|                     | eicosapentaenoate (EPA 20:5n3)                      | Polyunsaturated Fatty Acid (n3 and n6)           | 1.0055             | (1.0028,1.0081)          | 2e-04   |
|                     | docosahexaenoate (DHA 22:6n3)                       | Polyunsaturated Fatty Acid (n3 and n6)           | 1.0064             | (1.004,1.0087)           | <.0001  |
|                     | docosapentaenoate (n3DPA 22:5n3)                    | Polyunsaturated Fatty Acid (n3 and n6)           | 1.0028             | (1.0004,1.0052)          | 0.0254  |
|                     | linolenate [alpha or gamma; (18:3n3 or 6)]          | Polyunsaturated Fatty Acid (n3 and n6)           | 1.0026             | (1.0001,1.005)           | 0.041   |
|                     | X-02269                                             | unknown                                          | 1.0127             | (1.0087,1.0167)          | <.0001  |
| Fruiting vegetables | stearate (18:0)                                     | Long Chain Fatty Acid                            | 0.9995             | (0.999,1)                | 0.045   |
|                     | androsterone sulfate                                | Steroid                                          | 0.9986             | (0.9973,1)               | 0.0483  |
| Fruits              | oxalate (ethanedioate)                              | Ascorbate and Aldarate Metabolism                | 1.0003             | (1.0001,1.0006)          | 0.006   |
|                     | stachydrine                                         | Food Component/Plant                             | 1.0007             | (1.0001,1.0013)          | 0.0208  |

## Supplementary data

| Food group       | Metabolite                                            | Subpathway                                 | $\beta$ -Estimator | Confidence interval (CI) | p.value |
|------------------|-------------------------------------------------------|--------------------------------------------|--------------------|--------------------------|---------|
| Leafy vegetables | methyl-beta-glucopyranoside                           | Fructose, Mannose and Galactose Metabolism | 1.0010             | (1.0001,1.0018)          | 0.0332  |
|                  | X-11315                                               | unknown                                    | 1.0004             | (1.0002,1.0007)          | 0.0014  |
|                  | X-17145                                               | unknown                                    | 1.0010             | (1.0002,1.0019)          | 0.0265  |
|                  | catechol sulfate                                      | Benzoate Metabolism                        | 1.0049             | (1.0008,1.009)           | 0.0214  |
|                  | Palmitoleate (16:1n7)                                 | Long Chain Fatty Acid                      | 0.9967             | (0.9935,1)               | 0.0487  |
|                  | X-16132                                               | unknown                                    | 0.9902             | (0.9831,0.9974)          | 0.0094  |
| Margarines       | X-17259                                               | unknown                                    | 1.0069             | (1.0001,1.0138)          | 0.0492  |
|                  | X-11261                                               | unknown                                    | 1.0086             | (1.0044,1.0127)          | 1e-04   |
|                  | X-11478                                               | unknown                                    | 1.0125             | (1.0043,1.0208)          | 0.0035  |
| Milk             | X-11521                                               | unknown                                    | 1.0098             | (1.0025,1.0172)          | 0.0097  |
|                  | 2-aminoheptanoate                                     | Fatty Acid, Amino                          | 0.9988             | (0.9978,0.9998)          | 0.0328  |
|                  | acisoga                                               | Polyamine Metabolism                       | 0.9997             | (0.9994,1)               | 0.037   |
| Miscellaneous    | X-21365                                               | unknown                                    | 1.0004             | (1.0002,1.0006)          | 0.0012  |
|                  | Catechol sulfate                                      | Benzoate Metabolism                        | 1.0208             | (1.0022,1.0396)          | 0.0319  |
| Nuts and seeds   | 4-hydroxyhippurate                                    | Benzoate Metabolism                        | 1.0208             | (1.0013,1.0407)          | 0.0385  |
|                  | X-11315                                               | unknown                                    | 1.0084             | (1.0006,1.0162)          | 0.0377  |
| Offals           | isovalerate                                           | Leucine, Isoleucine and Valine Metabolism  | 0.9693             | (0.9462,0.9931)          | 0.0125  |
| Other vegetables | bilirubin (Z,Z)                                       | Hemoglobin and Porphyrin Metabolism        | 0.9932             | (0.987,0.9994)           | 0.0365  |
| Other vegetables | bilirubin (E,E)*                                      | Hemoglobin and Porphyrin Metabolism        | 0.9965             | (0.9933,0.9998)          | 0.0418  |
| Potatoes         | X-16136                                               | unknown                                    | 1.0032             | (1.0001,1.0062)          | 0.0455  |
|                  | X-19429                                               | unknown                                    | 1.0037             | (1.0007,1.0067)          | 0.019   |
| Processed meat   | pyroglutamine*                                        | Glutamate Metabolism                       | 0.9971             | (0.9946,0.9996)          | 0.034   |
| Sauces           | 3-(4-hydroxyphenyl)lactate                            | Phenylalanine and Tyrosine Metabolism      | 0.9950             | (0.9906,0.9995)          | 0.0324  |
| Spirits          | 4-androsten-3 $\beta$ ,17 $\beta$ -diol disulfate(1)* | Steroid                                    | 1.0220             | (1.0042,1.0402)          | 0.0183  |
| Sugar            | creatine                                              | Creatine Metabolism                        | 0.9977             | (0.9955,0.9998)          | 0.0382  |
|                  | stearoylcarnitine                                     | Fatty Acid Metabolism(Acyl Carnitine)      | 1.0058             | (1.0004,1.0112)          | 0.043   |
|                  | pyroglutamine*                                        | Glutamate Metabolism                       | 1.0032             | (1.0005,1.0059)          | 0.0266  |
|                  | 1-dihomo-linolenoyl-GPC(20:3n3or6)*                   | Lysolipid                                  | 1.0022             | (1.0001,1.0042)          | 0.0427  |
|                  | 1-palmitoyl-GPC (16:0)                                | Lysolipid                                  | 1.0012             | (1.0001,1.0024)          | 0.0391  |
|                  | 1-linoleoyl-GPC (18:2)                                | Lysolipid                                  | 1.0020             | (1.0002,1.0039)          | 0.039   |
|                  | 2-palmitoyl-GPC (16:0)*                               | Lysolipid                                  | 1.0024             | (1.0004,1.0043)          | 0.019   |
|                  | 2-stearoyl-GPC (18:0)*                                | Lysolipid                                  | 1.0022             | (1.0004,1.0041)          | 0.02    |
|                  | 1-pentadecanoyl-GPC (15:0)*                           | Lysolipid                                  | 1.0079             | (1.0021,1.0138)          | 0.0113  |
|                  | indolepropionate                                      | Tryptophan Metabolism                      | 1.0003             | (1,1.0006)               | 0.0317  |
|                  | X-09789                                               | unknown                                    | 1.0004             | (1.0001,1.0008)          | 0.0148  |
| Tea              | X-14473                                               | unknown                                    | 0.9995             | (0.9991,0.9998)          | 0.0077  |

## Supplementary data

| Food group    | Metabolite                     | Subpathway                                  | $\beta$ -Estimator | Confidence interval (CI) | p.value |
|---------------|--------------------------------|---------------------------------------------|--------------------|--------------------------|---------|
|               | X-18901                        | unknown                                     | 1.0003             | (1,1.0006)               | 0.0305  |
|               | N-delta-acetylornithine*       | Urea cycle; Arginine and Proline Metabolism | 1.0003             | (1,1.0007)               | 0.0396  |
| Vegetable oil | catechol sulfate               | Benzoate Metabolism                         | 1.0111             | (1.0013,1.0209)          | 0.0276  |
| Wine          | eicosapentaenoate (EPA 20:5n3) | Polyunsaturated Fatty Acid (n3 and n6)      | 1.0006             | (1.0001,1.0011)          | 0.0432  |
|               | X-11372                        | unknown                                     | 0.9996             | (0.9992,0.9999)          | 0.0266  |
|               | X-11787                        | unknown                                     | 0.9998             | (0.9997,1)               | 0.047   |
|               | X-11880                        | unknown                                     | 0.9995             | (0.9992,0.9999)          | 0.0244  |

<sup>1</sup> Other cereals includes: Flour flakes starch, breakfast cereals, dough; Abbreviations: CI, confidence interval



## Supplementary data

**Table S5:** Food-metabolite associations in the identification analysis for men and their corresponding back transformed estimator and confidence interval found in the train dataset

| Food group     | Metabolite                                            | Subpathway                                | $\beta$ -Estimator | Confidence interval (CI) | p.value |
|----------------|-------------------------------------------------------|-------------------------------------------|--------------------|--------------------------|---------|
| Beer Cidre     | isobutyrylcarnitine                                   | Leucine, Isoleucine and Valine Metabolism | 0.9998             | (0.9996,1)               | 0.0188  |
|                | eicosapentaenoate (EPA 20:5n3)                        | Polyunsaturated Fatty Acid (n3 and n6)    | 1.0002             | (1,1.0003)               | 0.0462  |
|                | docosapentaenoate (n3DPA 22:5n3)                      | Polyunsaturated Fatty Acid (n3 and n6)    | 1.0002             | (1,1.0004)               | 0.0291  |
|                | 4-androsten-3 $\beta$ ,17 $\beta$ diol disulfate(1)*  | Steroid                                   | 1.0004             | (1.0001,1.0008)          | 0.0187  |
|                | X-11799                                               | unknown                                   | 1.0004             | (1.0001,1.0007)          | 0.0197  |
|                | X-14473                                               | unknown                                   | 1.0003             | (1.0001,1.0006)          | 0.0245  |
|                | theobromine                                           | Xanthine Metabolism                       | 0.9996             | (0.9992,0.9999)          | 0.0214  |
| Butter         | 15-methylpalmitate                                    | Fatty Acid, Branched                      | 1.0121             | (1.001,1.0234)           | 0.0373  |
|                | X-11261                                               | unknown                                   | 0.9913             | (0.9849,0.9976)          | 0.0098  |
| Cake cookies   | pipecolate                                            | Lysine Metabolism                         | 0.9985             | (0.997,0.9999)           | 0.0403  |
|                | 4-androsten-3 $\beta$ ,17 $\beta$ -diol disulfate(1)* | Steroid                                   | 0.9976             | (0.9952,1)               | 0.0496  |
|                | X-11372                                               | unknown                                   | 1.0018             | (1.0003,1.0032)          | 0.0187  |
| Cheese         | 2 methylbutyrylcarnitine (C5)                         | Leucine, Isoleucine and Valine Metabolism | 1.0029             | (1.0001,1.0058)          | 0.0464  |
|                | X-12544                                               | unknown                                   | 1.0094             | (1.0011,1.0178)          | 0.0292  |
| Chocolate      | 7-methylxanthine                                      | Xanthine Metabolism                       | 1.0259             | (1.0043,1.048)           | 0.0257  |
| Coffee         | hippurate                                             | Benzoate Metabolism                       | 1.0004             | (1,1.0008)               | 0.0499  |
|                | catecholsulfate                                       | Benzoate Metabolism                       | 1.0003             | (1.0001,1.0005)          | 0.009   |
|                | 4-vinylphenol sulfate                                 | Benzoate Metabolism                       | 1.0004             | (1.0001,1.0008)          | 0.0238  |
|                | 3-methylcatechol sulfate (1)                          | Benzoate Metabolism                       | 1.0005             | (1.0001,1.0008)          | 0.0071  |
|                | phenylcarnitine*                                      | Chemical                                  | 1.0004             | (1,1.0008)               | 0.0493  |
|                | X-12816                                               | unknown                                   | 1.0008             | (1.0004,1.0012)          | 0.0017  |
|                | X-14473                                               | unknown                                   | 1.0005             | (1.0002,1.0008)          | 0.0023  |
|                | X-16125                                               | unknown                                   | 1.0007             | (1.0003,1.0011)          | 0.0011  |
|                | paraxanthine                                          | Xanthine Metabolism                       | 1.0007             | (1.0004,1.0011)          | 1e-04   |
|                | theophylline                                          | Xanthine Metabolism                       | 1.0008             | (1.0004,1.0011)          | 3e-04   |
|                | 1-methylurate                                         | Xanthine Metabolism                       | 1.0006             | (1.0002,1.001)           | 0.0037  |
|                | caffeine                                              | Xanthine Metabolism                       | 1.0005             | (1.0001,1.0009)          | 0.0138  |
|                |                                                       |                                           |                    |                          |         |
| Dairy products | stachydrine                                           | Food Component/Plant                      | 1.0023             | (1.0006,1.0041)          | 0.0121  |
|                | X-21365                                               | unknown                                   | 1.0008             | (1.0001,1.0015)          | 0.0225  |
| Eggs           | caproate (6:0)                                        | Medium Chain Fatty Acid                   | 0.9855             | (0.9724,0.9987)          | 0.0364  |
|                | X-16982                                               | unknown                                   | 1.0130             | (1.0008,1.0254)          | 0.0406  |
| Fish           | 3-carboxy-4-methyl-5-propyl-2-furanpropanoate (CMPF)  | Fatty Acid, Dicarboxylate                 | 1.0136             | (1.0073,1.02)            | 1e-04   |
|                | erucate (22:1n9)                                      | Long Chain Fatty Acid                     | 1.0088             | (1.0021,1.0155)          | 0.0158  |
|                | eicosenoate (20:1)                                    | Long Chain Fatty Acid                     | 1.0044             | (1.0005,1.0082)          | 0.0349  |
|                | 1-docosahexaenoyl-GPC (22:6)*                         | Lysolipid                                 | 1.0087             | (1.0026,1.0147)          | 0.0065  |

## Supplementary data

| Food group      | Metabolite                               | Subpathway                             | $\beta$ -Estimator | Confidence interval (CI) | p.value |
|-----------------|------------------------------------------|----------------------------------------|--------------------|--------------------------|---------|
|                 | 1-eicosapentaenoyl-GPC (20:5)*           | Lysolipid                              | 1.0053             | (1.0016,1.0091)          | 0.0059  |
|                 | 1-docosahexaenoyl-GPE (22:6)*            | Lysolipid                              | 1.0039             | (1.0011,1.0067)          | 0.0095  |
|                 | eicosapentaenoate (EPA 20:5n3)           | Polyunsaturated Fatty Acid (n3 and n6) | 1.0062             | (1.0031,1.0093)          | 4e-04   |
|                 | docosahexaenoate (DHA 22:6n3)            | Polyunsaturated Fatty Acid (n3 and n6) | 1.0062             | (1.0031,1.0093)          | 5e-04   |
|                 | docosapentaenoate (n3DPA 22:5n3)         | Polyunsaturated Fatty Acid (n3 and n6) | 1.0038             | (1.0005,1.0071)          | 0.0325  |
|                 | linolenate [alpha or gamma; (18:3n3or6)] | Polyunsaturated Fatty Acid (n3 and n6) | 1.0040             | (1.0008,1.0072)          | 0.017   |
|                 | X-02269                                  | unknown                                | 1.0117             | (1.0069,1.0166)          | <.0001  |
| Fruits          | X-11315                                  | unknown                                | 1.0004             | (1,1.0008)               | 0.0345  |
|                 | X-17145                                  | unknown                                | 1.0011             | (1.0001,1.0021)          | 0.04    |
| Margarines      | X-11261                                  | unknown                                | 1.0088             | (1.0037,1.0139)          | 9e-04   |
|                 | X-11478                                  | unknown                                | 1.0105             | (1.0011,1.0199)          | 0.031   |
|                 | X-11521                                  | unknown                                | 1.0099             | (1.0023,1.0177)          | 0.0123  |
| Milk            | 2-aminoheptanoate                        | Fatty Acid, Amino                      | 0.9987             | (0.9977,0.9997)          | 0.0148  |
|                 | X-21365                                  | unknown                                | 1.0004             | (1.0001,1.0006)          | 0.0079  |
| Nuts and seeds  | indolepropionate                         | Tryptophan Metabolism                  | 1.0265             | (1.0009,1.0528)          | 0.0445  |
| Other cereals   | X-09789                                  | unknown                                | 1.0195             | (1.0064,1.0328)          | 0.004   |
| Potatoes        | 4-hydroxyphenylpyruvate                  | Phenylalanine and Tyrosine Metabolism  | 0.9958             | (0.9919,0.9998)          | 0.0464  |
| Root vegetables | oxalate (ethanedioate)                   | Ascorbate and Aldarate Metabolism      | 1.0031             | (1.0002,1.0061)          | 0.0401  |
|                 | X-17259                                  | unknown                                | 1.0115             | (1.0008,1.0223)          | 0.0373  |
| Spirits         | p-cresol sulfate                         | Phenylalanine and Tyrosine Metabolism  | 0.9784             | (0.9578,0.9995)          | 0.0492  |
| Sugar           | erucate (22:1n9)                         | Long Chain Fatty Acid                  | 0.9934             | (0.987,0.9997)           | 0.0471  |
|                 | 1-pentadecanoyl-GPC (15:0)*              | Lysolipid                              | 1.0070             | (1.0003,1.0138)          | 0.0446  |

## Supplementary data

**Table S6:** Food-metabolite associations in the identification analysis and their corresponding back transformed estimator and confidence interval found in the test dataset

| Food group | Metabolite                                  | Estimator | Confidence Interval (CI) | p-Value* |
|------------|---------------------------------------------|-----------|--------------------------|----------|
| Coffee     | paraxanthine <sup>1</sup>                   | 1.0008    | (1.0004, 1.0011)         | 0.0346   |
|            | X-14473 <sup>2</sup>                        | 1.0013    | (1.0007, 1.0019)         | 0.0473   |
| Fish       | eicosapentaenoate (EPA_20:5n3) <sup>1</sup> | 1.0068    | (1.0039, 1.0098)         | 0.0445   |
|            | X-02269 <sup>1</sup>                        | 1.0112    | (1.0067, 1.0158)         | 0.0054   |

<sup>1</sup> found in men; found in <sup>2</sup>women; \*adjusted for multiple testing according to Bonferroni correction

**Table S7:** Food groups used in the present analysis

| Number | Food group          | Corresponding food items                                                                                     |
|--------|---------------------|--------------------------------------------------------------------------------------------------------------|
| 1      | Potatoes            | Potatoes                                                                                                     |
| 2      | Leafy vegetables    | Leafy vegetables                                                                                             |
| 3      | Fruiting vegetables | Fruiting vegetables                                                                                          |
| 4      | Root vegetables     | Root vegetables                                                                                              |
| 5      | Cabbages            | Cabbages                                                                                                     |
| 6      | Other vegetables    | Mushrooms<br>Pods vegetables<br>Onions<br>Stalk vegetables<br>Salad                                          |
| 7      | Legumes             | Legumes                                                                                                      |
| 8      | Fruits              | Fruits                                                                                                       |
| 9      | Nuts and seeds      | Nuts and seeds                                                                                               |
| 10     | Other fruits        | Mixed Fruits                                                                                                 |
| 11     | Milk                | Milk                                                                                                         |
| 12     | Dairy products      | Dairy drinks<br>Yogurt<br>Crud<br>Cream desserts pudding<br>Creme sour creme<br>Coffee Cream Coffee Whitener |
| 13     | Cheese              | Cheese                                                                                                       |
| 14     | Pasta, rice         | Noodles rice other Grains                                                                                    |
| 15     | Bread               | Bread<br>Crispbread rusk                                                                                     |
| 16     | Other cereals       | Flour flakes starch<br>Breakfast cereals<br>Dough                                                            |
| 17     | Red meat            | Unclassified Meat Meat products<br>Beef<br>Pork                                                              |

## Supplementary data

| Number | Food group                 | Corresponding food items          |
|--------|----------------------------|-----------------------------------|
| 18     | Poultry                    | Unclassified and other chicken    |
|        |                            | Chicken                           |
| 19     | Processed meat             | Sausages                          |
| 20     | Offals                     | Offal                             |
| 21     | Fish                       | Fish                              |
|        |                            | Fish products                     |
| 22     | Eggs                       | Egg                               |
| 23     | Vegetable oil              | Vegetable oil                     |
| 24     | Margarines                 | Margarine                         |
| 25     | Butter                     | Butter                            |
| 26     | Other fats                 | Unclassified fat                  |
|        |                            | Frying fat                        |
|        |                            | Animal fat                        |
| 27     | Sugar                      | Sugar honey jam                   |
|        |                            | Sweets without chocolate          |
|        |                            | Syrup                             |
|        |                            | Ice cream                         |
| 28     | Chocolate                  | Chocolate sweets                  |
| 29     | Cake, cookies              | Cakes pastries                    |
|        |                            | Biscuits                          |
| 30     | Fruit and vegetable juice  | Fruit and vegetable juices        |
| 31     | Soft drinks                | Lemonade Coke etc                 |
| 32     | Coffee                     | Coffee                            |
| 33     | Tea                        | Tea                               |
|        |                            | Herbal tea                        |
| 34     | Other non-alcoholic drinks | Unclassified non-alcoholic drinks |
|        |                            | Water                             |
| 35     | Wine                       | Wine                              |
| 36     | Beer, Cidre                | Beer Cidre                        |
| 37     | Spirits                    | Spirits                           |
| 38     | Other alcoholic beverages  | Dessert wine                      |
|        |                            | Aniseed drinks                    |
|        |                            | Liqueur                           |
|        |                            | Cocktails punch                   |
| 39     | Sauces                     | Unclassified sauce                |
|        |                            | Tomato sauce                      |
|        |                            | Dressings                         |

## Supplementary data

| Number | Food group    | Corresponding food items |
|--------|---------------|--------------------------|
| 40     | Soups         | Mayonnaise               |
|        |               | Dessert sauce            |
|        |               | Soup                     |
| 41     | Miscellaneous | Bouillon                 |
|        |               | Spices herbs             |
|        |               | Snacks                   |
|        |               | Soy products             |
|        |               | Sweeteners               |

**Table S8:** Annotation and metabolite descriptions

Cf. supplement: Excel file

**Table S9:** Applied search term

| Field        | Search term                                                                                                                                                                                                                                                                                                                                                                                                                                                                                                                |
|--------------|----------------------------------------------------------------------------------------------------------------------------------------------------------------------------------------------------------------------------------------------------------------------------------------------------------------------------------------------------------------------------------------------------------------------------------------------------------------------------------------------------------------------------|
| Exposure     | ("Diet"[Mesh] OR "Diet"[All Fields] OR "Food"[Mesh] OR "Food"[All Fields] "Dietary intake"[All Fields] OR "Food intake"[All Fields])                                                                                                                                                                                                                                                                                                                                                                                       |
| Outcome      | ("Biomarkers"[Mesh] OR "biomarkers"[All Fields] OR "metabolite"[All Fields] OR "metabolites"[All Fields] OR "metabolite profile"[All Fields] OR "metabolomics signature"[All Fields] OR "Metabolomics"[Mesh] OR "Metabolomics"[All Fields] OR "Metabolome"[Mesh] OR "Metabolome"[All Fields])                                                                                                                                                                                                                              |
| Biospecimen  | ("Blood"[Mesh] OR "Blood"[All Fields] OR "serum"[All Fields] OR "plasma"[All Fields])                                                                                                                                                                                                                                                                                                                                                                                                                                      |
| Study design | ("Cohort Studies"[Mesh] OR "Cohort Studies"[All fields] OR "Case-Control Studies"[Mesh] OR "Case-Control Studies"[All fields] OR "Cross-Sectional Studies"[Mesh] OR "Cross-Sectional Studies"[All fields] OR "Prospective Studies"[Mesh] OR "Prospective Studies"[All fields] OR "Retrospective Studies"[Mesh] "Retrospective Studies"[All fields] OR "Epidemiologic Studies"[Mesh] OR "Epidemiologic Studies"[All Fields] OR "observational"[All Fields]) NOT ("in vitro techniques"[mh:noexp]) NOT ("animals"[mh:noexp]) |

Supplementary data
